# Supplementary material for: 3D printable hydrogel inks with metal–organic frameworks for sustained small drug delivery in wound healing
Source: Royal Society of Chemistry journal article supplement (doi:10.1039/d5tb01433f), 2025-01-01
Supplement: d5tb01433f1.pdf [file d5tb01433f1.pdf]

Fig. S1

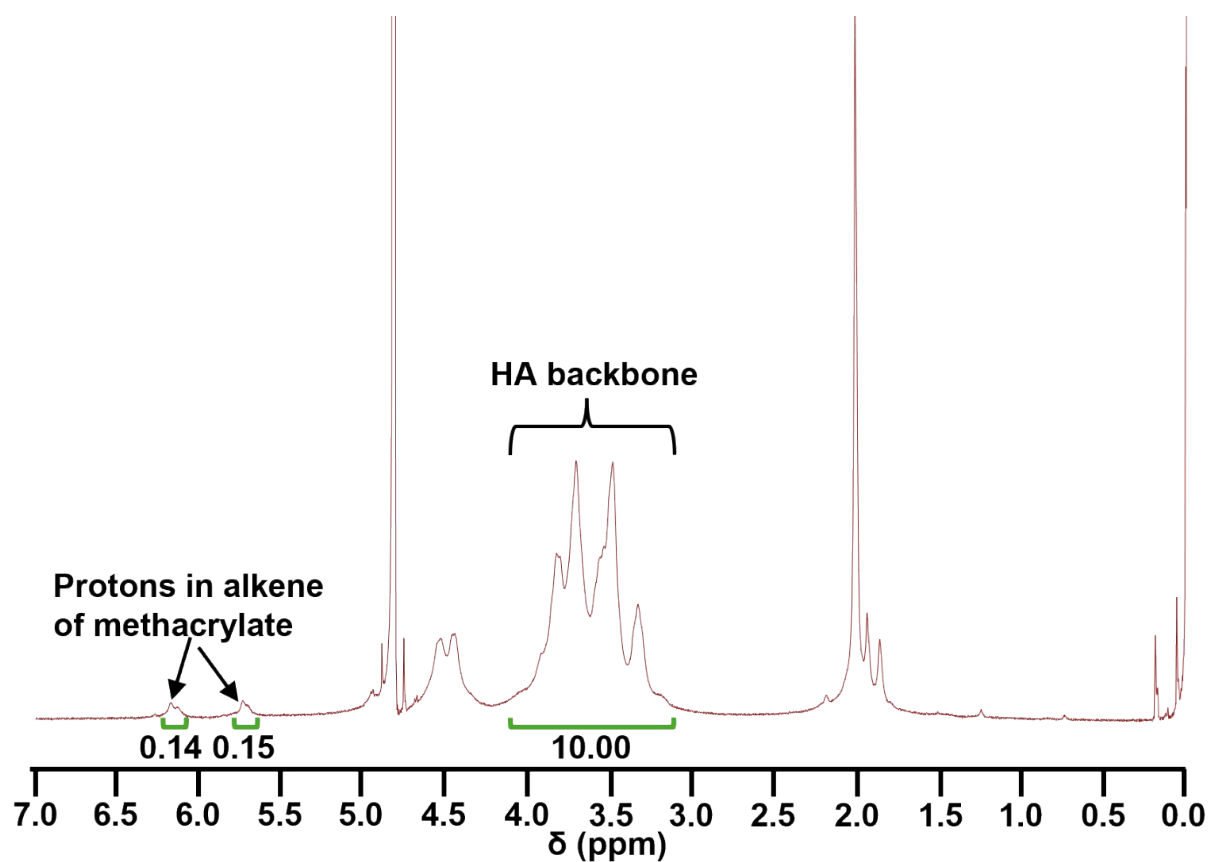

Fig. S1  $^1\text{H}$  NMR spectra of HAMA. Values below the peak indicate integral of each peak.

Fig. S2

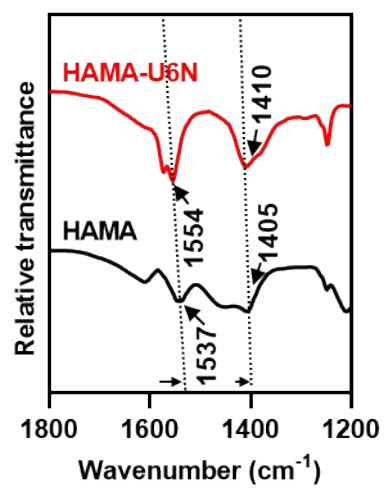

Fig. S2 FT-IR spectra of HAMA (black) and HAMA-U6N (red) in D<sub>2</sub>O

**Fig. S3**

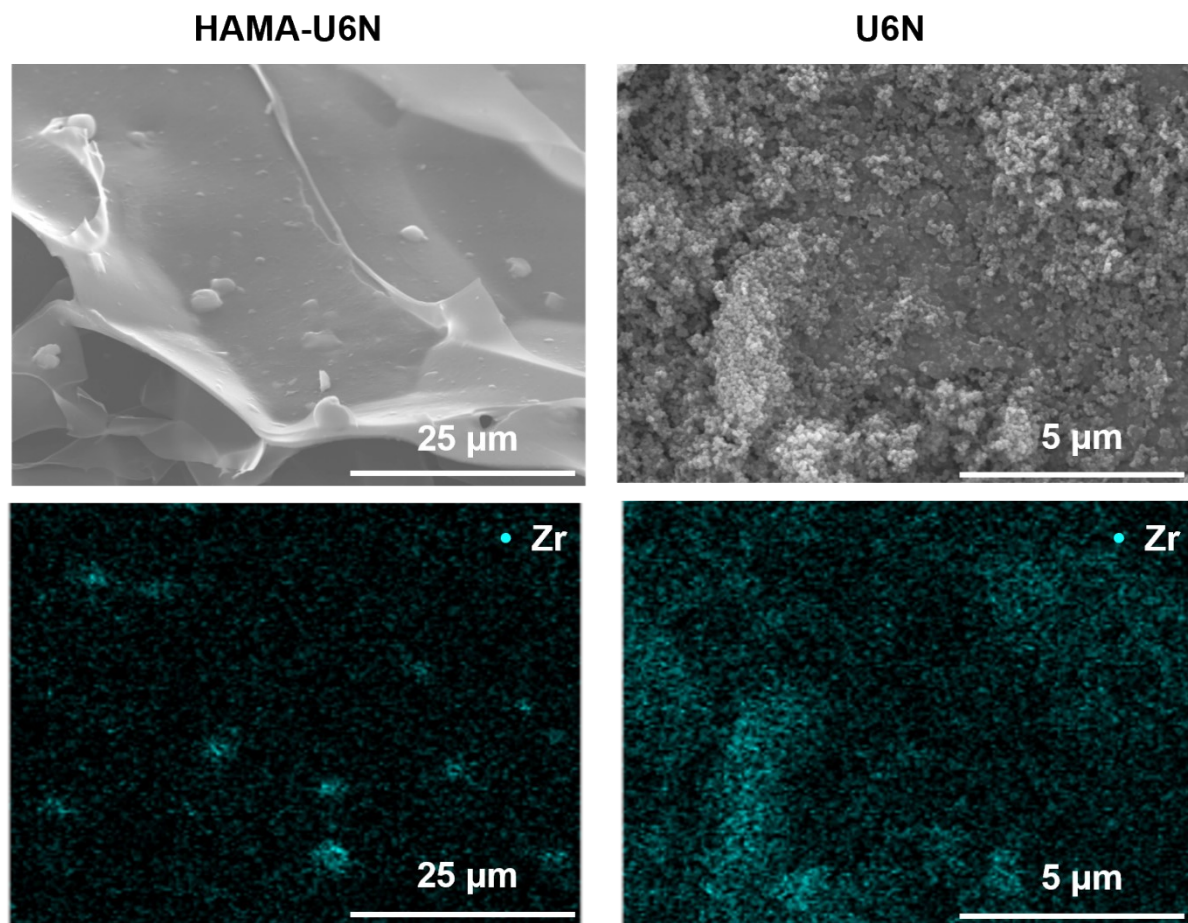

**Fig. S3** SEM images and EDS mapping of Zr in SEM images of HAMA-U6N and U6N respectively. Light blue clusters indicate zirconium.

**Fig. S4**

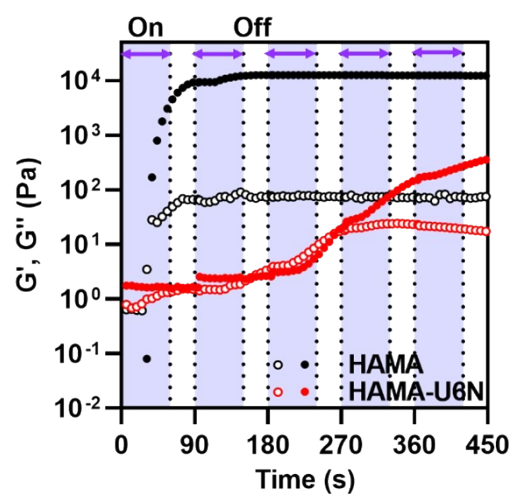

**Fig. S4** Rheological analysis of HAMA (black) and HAMA-U6N (red) during UV on (60 seconds, purple) and off (30 seconds) cycles.

Fig. S5

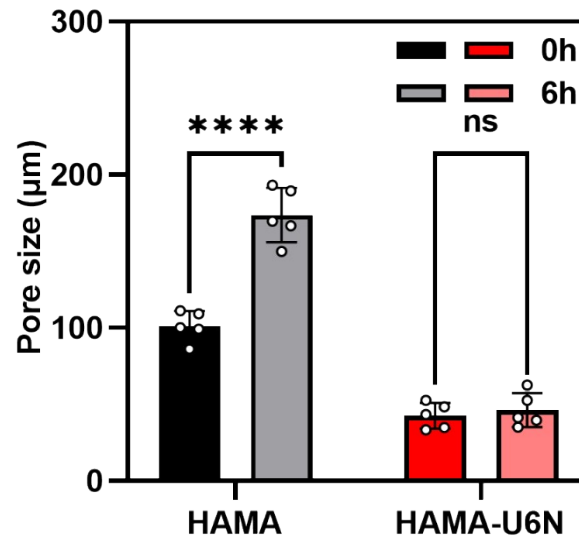

**Fig. S5** Pore size of freeze-dried HAMA and HAMA-U6N before swelling (HAMA: black, HAMA-U6N: red) and swollen for 6 hours (HAMA: grey, HAMA-U6N: pink) respectively. Statistical significance was determined by One-way ANOVA followed by Tukey's post hoc test. \*\*\*\* $P < 0.0001$ , and ns for "not significant".

Fig. S6

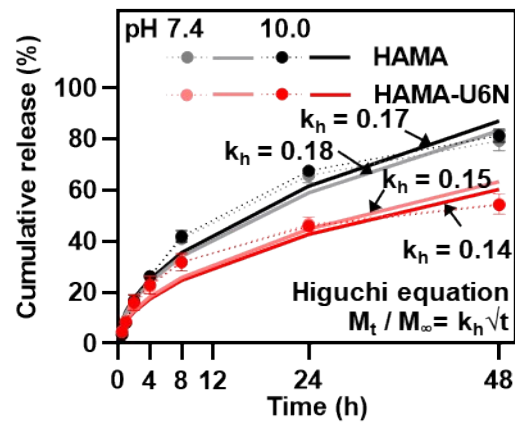

**Fig. S6** *In vitro* release profiles of quercetin from HAMA (grey for pH 7.4 and black for pH 10.0), HAMA-U6N (pink for pH 7.4 and red for pH 10.0) hydrogels and fitted curve calculated with Higuchi model ( $M_t / M_\infty = k_h \sqrt{t}$ ), where  $M_t$  and  $M_\infty$  each indicates amount released at time  $t$  and total releasable amount.  $k_h$  indicates apparent Higuchi rate constant. Each solid line indicates the fitted curve.

**A**

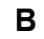

**Fig. S7** (A) Live/dead fluorescence staining of L929 cells after 24 h incubation. (scale bar = 500  $\mu$ m) (B) Quantification of cell viability (%) based on live/dead assay of U6N concentrations of 0, 0.05, 0.1, 0.5, 1 mg/mL. Statistical significance was determined by one-way ANOVA and Tukey's post hoc test. ns denotes "not significant".

Fig. S8

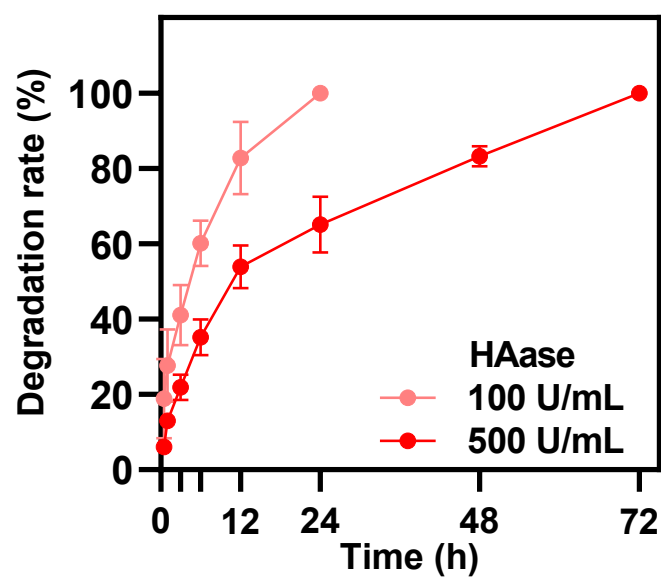

**Fig. S8** Degradation rate of HAMA-U6N under HAase condition (100 U/mL for pink and 500 U/mL for red) over 72 h ( $n = 4$ ).



Fig. S9

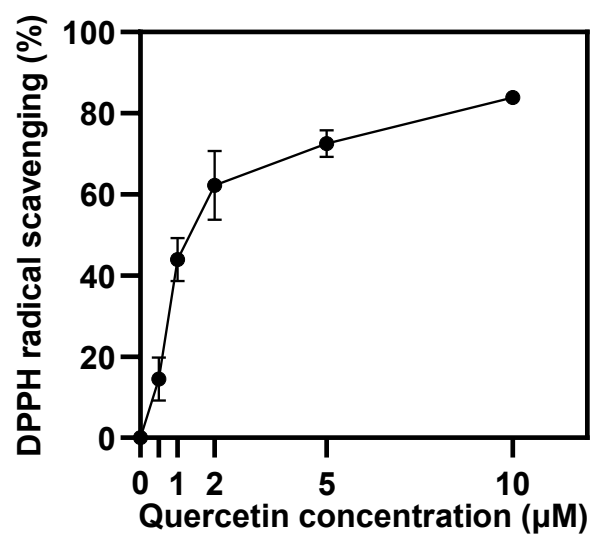

Fig. S9 Radical scavenging ability of quercetin concentrations of 0.5, 1, 2, 5, 10  $\mu\text{M}$  ( $n = 5$ ).

**Fig. S10**

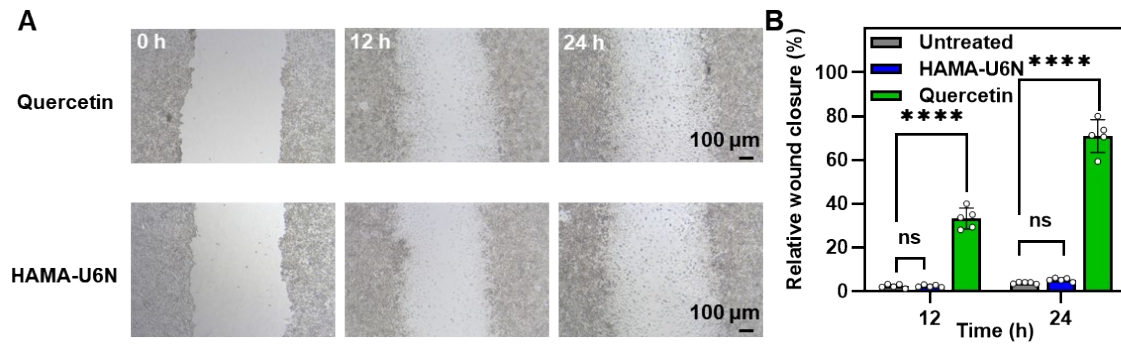

**Fig. S10** (A) OM images of wound-scratch assay at 0, 12, and 24 h for each treatment group (Untreated, HAMA-U6N, Quercetin) (scale bar = 100  $\mu$ m). (B) Quantification of wound closure (%) after 12 and 24 h in untreated (grey), HAMA-U6N (blue), and Quercetin (green) groups ( $n = 5$ ). Statistical significance was determined by one-way ANOVA and Tukey's post hoc test. \*\*\*\* $P < 0.0001$ , ns denotes "not significant".
